# Supplementary material for: Spontaneous space closure after extraction of young first permanent molar. Retrospective cohort study
Source: PeerJ. 2024 Oct 23;12:e18276. doi: 10.7717/peerj.18276 (PMC11512553; doi:10.7717/peerj.18276)
Supplement: Supplemental Information 1 [file peerj-12-18276-s001.xlsx]

## Sheet: Codes
Hospital	Gender	Age_At_treatment	Age_group	Arch	Quadrant_of_Extracted_FPM	Demirjian_stageofSPM_before_extraction	Angulation_of_SPM_before_extraction	TwoScore_IPC_Between2ndPremolarand2ndMolarinExtractionSide	Severity_Of_IPC_Between2ndPremolarand2ndMolarinExtractionSide	TwoScore_IPC_BetweenPremolarsinExtractionside	Severity_Of_IPC_BetweenPremolarsinExtractionside	IPC_Between2ndPremolarandFPMinNonExtractionSide	Severity_of_IPC_Between2ndPremolarandFPMinNonExtractionSid	IPC_BetweenPremolarsinNonExtractionSide	Severity_of_IPC_BetweenPremolarsinNonExtractionSide	TwoScore_Rotation_Of2ndPremolarInExtractionSide	Severity_of_Rotation_Of2ndPremolarInExtractionSide	TwoScore_Rotation_Of2ndMolarInExtractionSide	Severity_of_Rotation_Of2ndMolarInExtractionSide	Rotation_Of2ndPremolarInNonExtractionSide	Severity_of_Rotation_Of2ndPremolarInNonExtractionSide	Rotation_Of1stMolarInNonExtractionSide	Severity_of_Rotation_Of1stMolarInNonExtractionSide	TwoScore_MarginalRidge_InExtractionSide	Severity_of_MR_Between2ndPremAnd2ndMolar_InExtractionSide	MarginalRidge_Between2ndPremAndFPM_InNonExtractionSide	Severity_of_MR_Between2ndPremAndFPM_InNonExtractionSide	TwoScore_Buccolingual_Inclination_Of2ndMolarInExtractionSide	Severity_of_Buccolingual_Inclination_Of2ndMolarInExtractionSide	Buccolingual_Inclination_Of1stMolarInNonExtractionSide	SeverityOFBuccolingual_Inclination_Of1stMolarInNonExtractionSide	TwoScore_RootAngulation_of2ndMolarInExtractionSide	Side_of_angulation_of2ndMolarInExtractionSide	RootAngulation_Of1stMolarInNonExtractionSide	Side_Of_Angulation_Of1stMolarInNonExtractionSide	Combined_clinic_ABO_2Group_favour	Demirjian_two	Dmirigian_3_groups
3	1	8	1	1	1	1	2	0	0	0	0	0	0	0	0	1	2	1	3	0	0	0	0	0	0	0	0	1	1	0	0	1	1	0	0	1	1	1
3	1	9	2	2	4	2	1	1	2	0	0	4	4	4	4	1	2	1	3	4	4	4	4	1	2	4	4	1	1	4	4	1	1	4	4	2	1	2
3	1	11	3	2	3	3	1	1	4	0	0	0	0	0	0	1	2	0	0	0	0	1	1	1	1	0	0	1	1	0	0	1	1	1	1	2	2	3
1	1	8	1	2	4	2	1	1	4	0	0	0	0	0	0	1	2	1	3	1	1	1	1	1	2	0	0	1	2	0	0	1	1	0	0	2	1	2
3	2	12	3	2	4	3	1	1	4	1	1	0	0	0	0	0	0	0	0	0	0	0	0	0	0	0	0	1	3	2	3	1	1	1	1	1	2	3
2	1	10	2	1	2	2	3	1	1	1	2	0	0	0	0	0	0	1	3	0	0	0	0	0	0	1	1	0	0	0	0	1	1	0	0	2	1	2
1	1	8	1	2	3	2	1	0	0	1	1	0	0	0	0	1	5	1	4	2	3	2	2	0	0	0	0	1	3	1	1	1	1	0	0	2	1	2
1	1	12	3	2	3	3	1	1	8	0	0	0	0	0	0	0	0	1	8	0	0	0	0	1	4	0	0	1	4	0	0	1	1	0	0	2	2	3
3	2	11	3	2	4	3	1	1	2	0	0	0	0	0	0	0	0	1	1	0	0	0	0	0	0	0	0	1	3	1	1	1	1	0	0	1	2	3
3	2	8	1	2	3	1	1	0	0	0	0	4	4	4	4	0	0	1	1	4	4	4	4	0	0	4	4	1	3	4	4	1	1	4	4	1	1	1
3	2	8	1	2	4	1	1	0	0	0	0	4	4	4	4	0	0	1	1	4	4	4	4	0	0	4	4	1	3	4	4	1	1	4	4	1	1	1
3	2	8	1	1	2	2	2	0	0	0	0	0	0	0	0	0	0	0	0	0	0	0	0	0	0	0	0	0	0	0	0	0	0	0	0	1	1	2
3	2	9	2	1	1	2	2	0	0	0	0	0	0	0	0	0	0	1	2	0	0	0	0	0	0	0	0	0	0	0	0	1	1	0	0	1	1	2
3	2	9	2	2	4	2	1	0	0	0	0	0	0	0	0	1	2	0	0	0	0	0	0	0	0	0	0	1	4	0	0	1	1	0	0	1	1	2
3	1	8	1	2	3	1	3	0	0	0	0	0	0	0	0	0	0	0	0	0	0	0	0	0	0	0	0	0	0	0	0	0	0	0	0	1	1	1
3	2	9	2	2	3	2	3	0	0	1	1	0	0	0	0	1	2	1	3	0	0	0	0	0	0	0	0	1	3	1	1	1	1	0	0	2	1	2
3	2	9	2	2	3	2	1	0	0	0	0	4	4	4	4	1	1	1	3	4	4	4	4	0	0	4	4	1	1	4	4	1	1	4	4	1	1	2
3	2	9	2	2	4	2	1	1	1	0	0	4	4	4	4	0	0	1	1	4	4	4	4	0	0	4	4	1	1	4	4	1	1	4	4	1	1	2
3	1	8	1	2	3	1	1	1	1	0	0	0	0	0	0	0	0	1	2	0	0	0	0	1	1	0	0	1	1	0	0	1	1	1	1	2	1	1
3	1	9	2	2	4	2	3	0	0	0	0	0	0	0	0	0	0	0	0	0	0	0	0	0	0	0	0	1	1	0	0	1	1	0	0	1	1	2
1	1	9	2	2	4	2	1	1	1	1	4	4	4	4	4	1	4	0	0	4	4	4	4	0	0	4	4	1	3	4	4	1	1	4	4	2	1	2
1	1	9	2	2	3	2	1	1	1	1	5	4	4	4	4	1	4	0	0	4	4	4	4	1	1	4	4	1	2	4	4	1	1	4	4	2	1	2
3	1	9	2	2	4	2	1	0	0	0	0	0	0	0	0	0	0	0	0	0	0	0	0	0	0	0	0	1	1	0	0	1	1	0	0	1	1	2
3	2	9	2	1	2	2	2	0	0	0	0	0	0	0	0	0	0	1	1	0	0	1	1	0	0	0	0	0	0	0	0	0	0	0	0	1	1	2
3	2	9	2	2	3	2	1	1	3	0	0	4	4	4	4	1	3	1	5	4	4	4	4	1	2	4	4	1	3	4	4	1	1	4	4	2	1	2
3	2	9	2	2	4	2	1	1	3	0	0	4	4	4	4	1	2	1	4	4	4	4	4	1	2	4	4	1	3	4	4	1	1	4	4	2	1	2
1	2	12	3	1	2	3	3	0	0	0	0	4	4	4	4	0	0	1	2	4	4	4	4	0	0	4	4	0	0	4	4	0	0	4	4	1	2	3
1	2	12	3	1	1	3	3	0	0	0	0	4	4	4	4	0	0	1	3	4	4	4	4	0	0	4	4	1	1	4	4	0	0	4	4	1	2	3
1	2	8	1	2	4	2	1	1	1	1	1	0	0	0	0	0	0	0	0	0	0	0	0	0	0	0	0	1	1	0	0	1	1	0	0	1	1	2
3	2	10	2	2	4	2	1	1	2	1	2	4	4	4	4	0	0	0	0	4	4	4	4	1	1	4	4	1	1	4	4	1	1	4	4	2	1	2
3	2	10	2	2	3	2	1	1	1	1	2	4	4	4	4	1	2	1	2	4	4	4	4	0	0	4	4	1	1	4	4	1	1	4	4	2	1	2
3	2	10	2	2	4	3	1	1	4	0	0	0	0	0	0	1	2	1	2	0	0	1	1	0	0	0	0	1	3	1	1	1	1	0	0	2	2	3
3	2	8	1	2	4	1	1	1	1	0	0	4	4	4	4	0	0	1	3	4	4	4	4	1	1	4	4	1	3	4	4	1	1	4	4	2	1	1
3	2	8	1	2	3	1	1	1	1	0	0	4	4	4	4	1	1	1	1	4	4	4	4	1	1	4	4	1	4	4	4	1	1	4	4	2	1	1
3	2	13	3	2	3	4	1	1	6	0	0	4	4	4	4	1	3	1	3	4	4	4	4	1	1	4	4	1	2	4	4	1	1	4	4	2	2	3
3	2	13	3	2	4	4	1	1	2	0	0	4	4	4	4	1	4	1	3	4	4	4	4	1	1	4	4	1	3	4	4	1	1	4	4	2	2	3
3	2	9	2	2	4	2	1	0	0	0	0	0	0	0	0	1	3	1	3	0	0	0	0	0	0	0	0	1	3	1	1	1	1	0	0	1	1	2
3	1	11	3	2	3	3	1	1	4	0	0	0	0	0	0	0	0	1	2	0	0	0	0	0	0	0	0	1	1	0	0	1	1	0	0	1	2	3
1	2	10	2	2	3	2	1	0	0	1	2	4	4	4	4	1	2	0	0	4	4	4	4	0	0	4	4	1	1	4	4	1	1	4	4	1	1	2
1	2	10	2	2	4	2	1	0	0	1	2	4	4	4	4	1	5	0	0	4	4	4	4	1	2	4	4	1	2	4	4	1	1	4	4	2	1	2
3	2	10	2	1	1	2	2	0	0	0	0	0	0	0	0	0	0	1	3	1	1	0	0	0	0	0	0	0	0	0	0	1	1	1	1	1	1	2
3	2	9	2	2	4	2	1	1	2	0	0	0	0	0	0	0	0	1	1	0	0	0	0	1	1	0	0	1	2	0	0	1	1	0	0	2	1	2
3	2	10	2	2	4	3	1	1	6	0	0	0	0	0	0	1	3	1	3	1	1	0	0	1	1	0	0	1	2	0	0	1	1	0	0	2	2	3
1	2	10	2	2	4	2	1	0	0	0	0	4	4	4	4	1	4	1	3	4	4	4	4	0	0	4	4	0	0	4	4	1	1	4	4	1	1	2
1	2	10	2	2	3	2	1	1	3	0	0	4	4	4	4	1	3	1	4	4	4	4	4	1	0	4	4	1	1	4	4	1	1	4	4	2	1	2
3	2	10	2	2	3	2	1	0	0	0	0	0	0	0	0	1	1	1	3	0	0	0	0	1	1	0	0	1	1	0	0	1	1	1	1	2	1	2
1	2	10	2	2	4	2	1	0	0	0	0	0	0	0	0	0	0	1	3	0	0	0	0	0	0	0	0	1	2	0	0	1	1	0	0	1	1	2
1	2	8	1	2	3	1	1	0	0	1	5	4	4	4	4	0	0	0	0	4	4	4	4	0	0	4	4	1	2	4	4	1	1	4	4	1	1	1
1	2	8	1	2	4	1	1	1	2	1	2	4	4	4	4	1	3	1	3	4	4	4	4	0	0	4	4	1	2	4	4	1	1	4	4	2	1	1
1	1	12	3	2	4	4	1	0	0	0	0	0	0	0	0	0	0	1	5	0	0	0	0	1	3	0	0	1	3	0	0	1	1	0	0	1	2	3
3	1	10	2	2	3	2	1	1	3	1	2	0	0	0	0	1	1	1	4	0	0	0	0	1	2	0	0	1	4	0	0	1	1	0	0	2	1	2
1	1	7	1	1	2	1	2	0	0	0	0	4	4	4	4	0	0	1	3	4	4	4	4	0	0	4	4	0	0	4	4	0	0	4	4	1	1	1
1	1	7	1	1	1	1	2	0	0	1	2	4	4	4	4	0	0	1	2	4	4	4	4	0	0	4	4	0	0	4	4	0	0	4	4	1	1	1
1	1	7	1	2	3	1	1	1	2	1	2	4	4	4	4	1	4	1	6	4	4	4	4	1	1	4	4	1	2	4	4	1	1	4	4	2	1	1
1	1	7	1	2	4	1	1	1	2	1	2	4	4	4	4	1	4	1	6	4	4	4	4	1	1	4	4	1	2	4	4	1	1	4	4	2	1	1
1	1	9	2	1	2	1	2	0	0	0	0	0	0	0	0	1	1	0	0	1	1	0	0	0	0	0	0	0	0	0	0	1	1	0	0	1	1	1
2	1	8	1	1	1	1	2	0	0	0	0	4	4	4	4	0	0	0	0	4	4	4	4	0	0	4	4	0	0	4	4	0	0	4	4	1	1	1
2	1	8	1	1	2	1	2	0	0	0	0	4	4	4	4	0	0	0	0	4	4	4	4	0	0	4	4	0	0	4	4	0	0	4	4	1	1	1
3	2	12	3	2	4	3	1	0	0	0	0	0	0	0	0	1	1	0	0	0	0	0	0	0	0	0	0	1	1	0	0	1	1	1	1	1	2	3
3	2	10	2	2	3	3	1	1	7	1	1	0	0	0	0	1	1	1	3	1	1	1	1	1	1	0	0	1	3	1	1	1	1	1	1	2	2	3
3	1	11	3	1	2	3	2	0	0	0	0	0	0	0	0	1	3	1	1	2	2	0	0	0	0	0	0	1	1	0	0	0	0	0	0	1	2	3
3	2	8	1	2	3	1	1	1	5	0	0	4	4	4	4	1	2	0	0	4	4	4	4	1	3	4	4	1	1	4	4	1	1	4	4	2	1	1
3	2	8	1	2	4	1	1	1	5	1	1	4	4	4	4	1	1	1	1	4	4	4	4	1	1	4	4	1	1	4	4	1	1	4	4	2	1	1
2	2	10	2	2	4	2	1	1	6	0	0	4	4	4	4	1	1	0	0	4	4	4	4	0	0	4	4	1	1	4	4	1	1	4	4	1	1	2
2	2	10	2	1	2	2	2	1	2	0	0	0	0	0	0	0	0	1	2	2	2	0	0	1	1	0	0	1	1	1	1	1	1	0	0	2	1	2
2	2	10	2	2	3	2	1	1	3	0	0	4	4	4	4	1	1	1	3	4	4	4	4	0	0	4	4	1	1	4	4	1	1	4	4	2	1	2
3	2	7	1	2	3	1	1	0	0	0	0	0	0	0	0	1	3	1	1	0	0	0	0	0	0	0	0	1	1	0	0	1	1	0	0	1	1	1
1	2	10	2	1	1	2	2	0	0	0	0	0	0	0	0	1	2	1	4	0	0	0	0	0	0	0	0	0	0	0	0	0	0	0	0	1	1	2
3	2	12	3	2	4	3	1	1	4	0	0	2	2	0	0	0	0	1	1	0	0	2	3	1	3	2	3	1	1	1	1	1	1	1	1	2	2	3
1	2	10	2	1	1	2	2	0	0	0	0	0	0	0	0	0	0	1	2	0	0	0	0	0	0	0	0	0	0	0	0	1	1	0	0	1	1	2
1	1	12	3	2	3	3	1	0	0	0	0	0	0	0	0	1	1	0	0	0	0	0	0	0	0	0	0	1	2	0	0	1	1	0	0	1	2	3
1	2	9	2	2	4	1	1	1	6	0	0	0	0	0	0	0	0	1	3	0	0	0	0	1	3	0	0	1	3	0	0	1	1	0	0	2	1	1
1	2	9	2	1	1	1	2	1	4	0	0	0	0	0	0	0	0	1	4	0	0	0	0	1	3	0	0	1	1	0	0	0	0	0	0	2	1	1
3	2	8	1	2	4	1	1	0	0	1	2	0	0	0	0	0	0	0	0	0	0	0	0	0	0	0	0	1	1	0	0	0	0	1	1	1	1	1
1	2	9	2	1	2	1	2	0	0	1	1	0	0	0	0	0	0	0	0	0	0	0	0	0	0	0	0	0	0	0	0	1	1	0	0	1	1	1
3	2	7	1	2	3	1	1	0	0	0	0	4	4	4	4	0	0	1	2	4	4	4	4	0	0	4	4	1	2	4	4	1	1	4	4	1	1	1
3	2	7	1	2	4	1	1	0	0	0	0	4	4	4	4	0	0	1	2	4	4	4	4	0	0	4	4	1	2	4	4	1	1	4	4	1	1	1
2	2	10	2	2	3	2	1	0	0	0	0	4	4	4	4	1	2	1	3	4	4	4	4	0	0	4	4	1	3	4	4	1	1	4	4	1	1	2
2	2	10	2	2	4	2	1	0	0	0	0	4	4	4	4	1	1	1	2	4	4	4	4	1	2	4	4	1	1	4	4	1	1	4	4	2	1	2
2	2	10	2	1	2	2	2	0	0	0	0	4	4	4	4	1	1	1	3	4	4	4	4	1	1	4	4	1	1	4	4	0	0	4	4	2	1	2
2	2	10	2	1	1	2	2	0	0	1	1	4	4	4	4	1	3	1	4	4	4	4	4	1	1	4	4	1	1	4	4	0	0	4	4	2	1	2
1	1	13	3	2	3	4	1	1	5	0	0	0	0	0	0	0	0	1	5	0	0	0	0	1	1	0	0	1	3	0	0	1	1	0	0	2	2	3
1	2	10	2	2	3	2	1	0	0	0	0	0	0	0	0	1	2	1	4	0	0	0	0	0	0	0	0	1	3	0	0	1	1	0	0	1	1	2
3	2	9	2	2	3	2	1	0	0	0	0	4	4	4	4	1	1	1	3	4	4	4	4	0	0	4	4	1	2	4	4	1	1	4	4	1	1	2
3	2	9	2	2	4	2	1	0	0	0	0	4	4	4	4	1	2	1	3	4	4	4	4	0	0	4	4	1	1	4	4	1	1	4	4	1	1	2
3	2	12	3	2	3	4	1	1	1	0	0	4	4	4	4	0	0	1	3	4	4	4	4	0	0	4	4	1	1	4	4	1	1	4	4	1	2	3
3	2	12	3	2	4	4	1	0	0	0	0	4	4	4	4	1	3	1	3	4	4	4	4	1	1	4	4	1	1	4	4	1	1	4	4	2	2	3
3	2	9	2	2	3	2	1	0	0	1	1	0	0	0	0	1	5	1	5	0	0	0	0	0	0	1	1	0	0	0	0	0	0	0	0	1	1	2
2	1	9	2	1	1	2	2	0	0	0	0	0	0	0	0	0	0	0	0	0	0	0	0	1	1	0	0	0	0	0	0	1	1	0	0	1	1	2
2	2	8	1	2	3	1	3	0	0	0	0	4	4	4	4	1	2	1	2	4	4	4	4	0	0	4	4	1	3	4	4	1	1	4	4	1	1	1
2	2	8	1	2	2	1	3	0	0	0	0	4	4	4	4	1	1	1	1	4	4	4	4	1	1	4	4	0	0	4	4	0	0	4	4	1	1	1
2	2	8	1	1	1	1	3	0	0	0	0	4	4	4	4	1	1	1	1	4	4	4	4	1	1	4	4	1	1	4	4	0	0	4	4	2	1	1
2	2	8	1	2	4	1	3	1	1	1	1	4	4	4	4	1	3	1	3	4	4	4	4	0	0	4	4	1	1	4	4	1	1	4	4	2	1	1
2	2	9	2	2	4	2	2	0	0	1	0	0	0	0	0	0	0	0	0	0	0	0	0	0	0	0	0	1	1	0	0	1	1	0	0	1	1	2
2	2	9	2	1	1	2	2	0	0	0	0	0	0	0	0	1	1	1	1	0	0	0	0	0	0	0	0	0	0	0	0	0	0	0	0	1	1	2
3	1	7	1	1	1	1	2	0	0	0	0	0	0	0	0	0	0	1	1	0	0	0	0	0	0	0	0	1	1	1	1	1	1	0	0	1	1	1
3	1	7	1	2	4	1	1	0	0	0	0	0	0	0	0	1	1	1	4	0	0	0	0	0	0	0	0	1	1	0	0	1	1	0	0	1	1	1
3	2	12	3	2	3	3	1	1	4	0	0	4	4	4	4	0	0	0	0	4	4	4	4	1	2	4	4	1	2	4	4	1	1	4	4	1	2	3
3	2	12	3	2	4	3	1	1	4	0	0	4	4	4	4	1	1	0	0	4	4	4	4	1	3	4	4	1	2	4	4	1	1	4	4	2	2	3
3	2	13	3	1	1	4	2	0	0	1	1	4	4	4	4	0	0	0	0	4	4	4	4	1	1	4	4	0	0	4	4	1	1	4	4	1	2	3
3	2	13	3	1	2	4	2	1	1	1	1	4	4	4	4	0	0	0	0	4	4	4	4	1	3	4	4	1	1	4	4	1	1	4	4	2	2	3
3	2	13	3	2	4	4	1	1	1	0	0	0	0	0	0	1	2	1	4	2	2	0	0	1	3	0	0	1	4	0	0	1	1	1	1	2	2	3
3	2	9	2	2	4	2	1	0	0	1	2	0	0	0	0	1	1	1	1	2	4	2	4	0	0	0	0	1	3	1	1	1	1	1	1	2	1	2
2	1	10	2	2	4	2	1	0	0	0	0	0	0	0	0	0	0	1	2	0	0	0	0	0	0	0	0	1	3	1	1	1	1	0	0	1	1	2
2	1	10	2	1	1	2	2	0	0	1	2	0	0	0	0	1	2	1	2	0	0	0	0	0	0	0	0	1	1	0	0	1	1	1	1	2	1	2
3	1	11	3	2	3	2	3	0	0	0	0	0	0	0	0	1	2	1	2	2	2	0	0	0	0	0	0	1	2	0	0	1	1	0	0	1	1	2
3	1	10	2	1	1	2	2	0	0	0	0	4	4	4	4	1	2	1	3	4	4	4	4	1	2	4	4	0	0	4	4	1	1	4	4	1	1	2
3	1	10	2	1	2	2	2	0	0	0	0	4	4	4	0	1	2	1	4	4	4	4	4	1	3	4	4	0	0	4	4	1	1	4	4	1	1	2
3	1	10	2	2	3	2	1	1	1	0	0	0	0	0	0	0	0	1	2	0	0	0	0	1	1	0	0	1	2	0	0	1	1	0	0	2	1	2
2	1	8	1	1	1	1	2	0	0	0	0	0	0	0	0	0	0	0	0	0	0	0	0	0	0	0	0	0	0	0	0	0	0	0	0	1	1	1
2	1	8	1	2	4	1	3	0	0	0	0	0	0	0	0	1	1	1	1	2	3	0	0	0	0	0	0	1	2	0	0	1	1	0	0	1	1	1
3	1	10	2	1	1	2	2	0	0	0	0	0	0	0	0	0	0	0	0	0	0	0	0	1	1	0	0	0	0	0	0	0	0	0	0	1	1	2
